# Supplementary material
Source: PubMed Central journal article supplement (PMC3221871)

**Supplemental Figure 1.** (A) Standard curve of the pH sensitivity of CFSE and TRITC-labeled WT-SA and  $\Delta$ oatA-SA. Bacteria were exposed to different pH buffers in the presence of nigericin. Ratiometric imaging using ImageJ particle analysis tool was used to quantitate the fluorescence per particle. (B) Representative images of CFSE and TRITC-labeled WT-SA and  $\Delta$ oatA-SA in BMDM immediately after phagocytosis and 120 min after internalization.

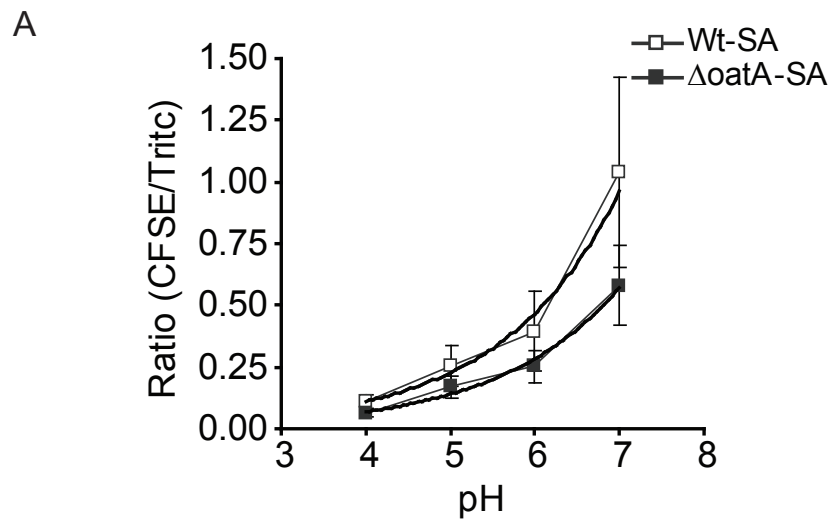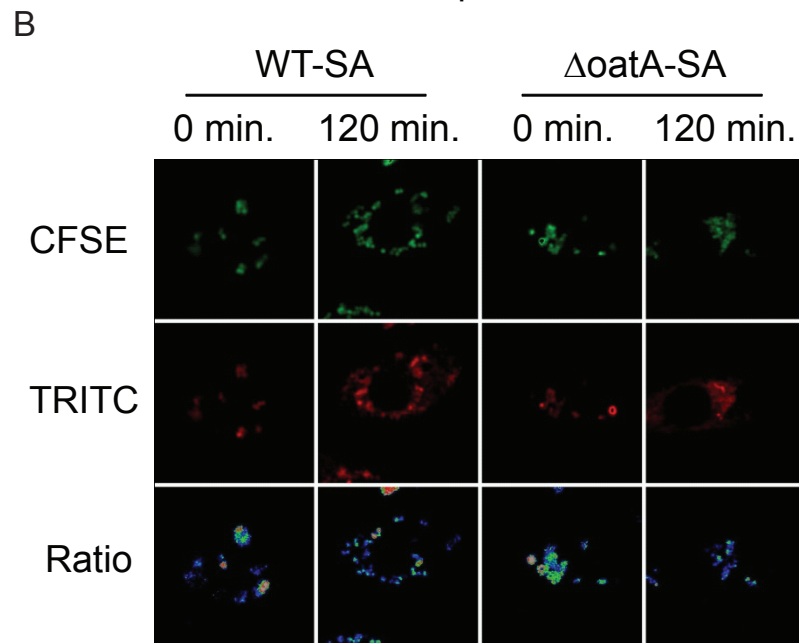

Supplement: NIHMS328423-supplement-1.pdf [file NIHMS328423-supplement-1.pdf]
